memory deficits" (added words are italicized). Our original sentence,<sup>3</sup> though correct, is vague and may lead some readers to infer that Dundee and Pandit studied aspects of memory other than retrograde amnesia.

M. M. GHONEIM, M.D.  
R. I. BLOCK, PH.D.  
Department of Anesthesia, College of Medicine  
The University of Iowa  
Iowa City, Iowa 52242

Anesthesiology  
77:215, 1992

### Amrinone in Patients Undergoing Cardiac Surgery

To the Editor:—Bailey *et al.*<sup>1</sup> conducted an excellent study of the pharmacokinetics of amrinone during cardiac surgery. However, I disagree with their conclusions regarding the inadequacy of low-dose amrinone (a 0.75-mg/kg intravenous loading dose and a 10- $\mu\text{g} \cdot \text{kg}^{-1} \cdot \text{min}^{-1}$  infusion) for providing inotropic support after cardiopulmonary bypass (CPB).

We<sup>2</sup> administered a loading dose of amrinone 0.75 mg/kg, followed by an infusion of 5  $\mu\text{g} \cdot \text{kg}^{-1} \cdot \text{min}^{-1}$  (combined with norepinephrine to maintain afterload), to patients during the immediate post-CPB period. The mean cardiac index increased by 65%. When a second dose of 0.75 mg/kg amrinone was given 30 min later and the infusion rate doubled, no additional increase in cardiac index occurred. We initially studied 7 patients but have since found this regimen to be predictable and effective in more than 200.

The finding that a linear dose relationship exists between plasma concentration and cardiac output in patients with chronic congestive heart failure<sup>3</sup> cannot be extrapolated to patients needing inotropic support immediately after CPB. Postbypass myocardial dysfunction is multifactorial, acute, and unpredictable with respect to severity. The plasma concentration of 1.7  $\mu\text{g}/\text{ml}$  is considered by some to be a threshold therapeutic level in a stable environment. However, blood levels and, presumably, intracellular levels are likely to fluctuate in the postbypass phase of hemodynamic instability and cannot be depended on to serve as rational guides to dosage choice.

Wilson *et al.*<sup>4</sup> demonstrated a counterclockwise hysteresis in patients with chronic congestive heart failure when cardiac index, corrected for baseline values, was plotted as a function of plasma concentration of amrinone. They observed a lack of concordance between the time course of changes in cardiac index and plasma concentration. The authors suggested that the site of action of amrinone is pharmacokinetically distinguishable from the plasma and from the tissues in instantaneous equilibrium with the plasma. The instability of the immediate post-CPB state would certainly enhance the disjunction between plasma levels and response to amrinone.

Bailey *et al.* incorrectly cited the work of Butterworth *et al.*<sup>5</sup> to support their conclusion that low-dose amrinone is inadequate in the immediate postbypass phase. The study described in the abstract of Butterworth *et al.* was done 24–36 h postoperatively and has little relevance to the optimal dosage in the immediate postbypass period.

Anesthesiology  
77:215–216, 1992

In Reply:—We agree with Lathi that the relationship between amrinone plasma levels and therapeutic effect in cardiac surgical patients

- #### REFERENCES
1. Dundee JW, Pandit SK: Studies on drug-induced amnesia with intravenous anaesthetic agents in man. *Br J Clin Pract* 26:164–166, 1972
  2. Osborn AG, Bunker JP, Cooper LM, Frank GS, Hilgard ER: Effects of thiopental sedation on learning and memory. *Science* 157:574–576, 1967
  3. Ghoneim MM, Block RI: Learning and consciousness during anesthesia. *ANESTHESIOLOGY* 79:279–305, 1992

(Accepted for publication April 1, 1992.)

Clearly, multiple factors affect heart function at separation from CPB. The appropriate dose of amrinone in patients separating from CPB is best determined by examining the therapeutic end-points of improved hemodynamic characteristics and cardiac indices. Although knowledge of pharmacokinetics is useful, we must avoid treating a blood level and remember that more is not necessarily better.

KISHOR G. LATHI, M.D.  
Assistant Professor  
Tufts University School of Medicine  
Department of Anesthesiology  
St. Elizabeth's Hospital of Boston  
736 Cambridge Street  
Boston, Massachusetts 02135

#### REFERENCES

1. Bailey JM, Levy JH, Rogers HG, Szlam F, Hug CC Jr: Pharmacokinetics of amrinone during cardiac surgery. *ANESTHESIOLOGY* 75:961–968, 1991
2. Lathi KG, Shulman MS, Diehl JT, Stetz JJ: The use of amrinone and norepinephrine for inotropic support during emergence from cardiopulmonary bypass. *J Cardiothorac Vasc Anesth* 5:250–254, 1991
3. Edelson J, Lejemtel TH, Alousi AA, Biddlecome CE, Maskin CS, Sonnenblick EH: Relationship between amrinone plasma concentration and cardiac index. *Clin Pharmacol Ther* 29:723–728, 1981
4. Wilson H, Rocci ML Jr, Weber KT, Andrews A, Likoff MJ: Pharmacokinetics and hemodynamics of amrinone in patients with chronic cardiac failure of diverse etiology. *Res Commun Chem Pathol Pharmacol* 56:3–19, 1987
5. Butterworth JF 4th, Royster RL, Robertie PG, Zaloga GP, Prielipp RC, Dudas LM: Hemodynamic effects of amrinone in patients recovering from aortocoronary bypass surgery (abstract). *Anesth Analg* 70:S45, 1990

(Accepted for publication April 1, 1992.)

immediately after cardiopulmonary bypass is unknown. A controlled study of this question is certainly needed. However, we do not believe

that the observation of Lathi *et al.*<sup>1</sup> represents such a study. They reported that cardiac index did not increase when a second 0.75-mg/kg bolus dose of amrinone was given 30 min after therapy was initiated with a 0.75-mg/kg bolus dose and  $5 \mu\text{g} \cdot \text{kg}^{-1} \cdot \text{min}^{-1}$  infusion. This observation was made in seven patients, five of whom were also receiving norepinephrine, a potent  $\beta_1$  agonist, as needed to maintain blood pressure.

It is difficult to interpret their observations on cardiac index since neither amrinone nor norepinephrine were administered in a controlled fashion. Administering a  $\beta_1$ -adrenergic agent in combination with a cyclic AMP-specific phosphodiesterase inhibitor creates a complex interaction that makes it impossible to identify the contribution of amrinone to any change (or lack of change) of contractility. Lathi's statement that they "initially studied seven patients but have since found this regimen to be predictable and effective in more than 200" represents an anecdotal comment. Furthermore, we would predict on the basis of our pharmacokinetic data that Lathi *et al.* did not significantly alter amrinone plasma concentrations by administering a second 0.75-mg/kg dose 30 min after the initial dose. Taking data from table 4 of our paper, we can predict, using standard pharmacokinetic calculations, that the initial average amrinone plasma concentration would be  $5.6 \mu\text{g/ml}$  and that the second bolus dose would only transiently increase this to  $7.1 \mu\text{g/ml}$ .<sup>2</sup> Using the data of Edelson *et al.*,<sup>3</sup> this small increment of amrinone plasma concentration would increase cardiac output by only 10%, which is not large enough to be measured reliably by routine thermodilution and among all the other variables in patients after cardiopulmonary bypass. Lathi has seemingly ignored one of the major points of our article—specifically, that despite a relatively long elimination half-time, plasma levels of amrinone will decrease rapidly after a bolus dose, even when an infusion is also given, due to distribution of amrinone to body tissues.

We also believe that Lathi has overstated the case for a lack of concordance between the time course of changes in cardiac index and plasma amrinone concentrations, suggested by the data of Wilson *et al.*<sup>4</sup> This was based on a single time point after oral administration and is hardly conclusive. Also, we are perplexed that although Lathi objects to our extrapolating the data of Edelson *et al.*<sup>5</sup> from patients with chronic heart failure, he is doing the very same thing in citing the work of Wilson *et al.*,<sup>4</sup> which was also drawn from patients with chronic congestive heart failure.

Finally, Lathi suggests that we have incorrectly cited the work of Butterworth *et al.* because the study of Butterworth *et al.* in cardiac surgical patients was performed 24–36 h postoperatively.<sup>6</sup> There are, however, other studies that also demonstrate the inadequacy of 0.75 mg/kg as a loading dose to improve cardiovascular function at the end of cardiopulmonary bypass.<sup>6</sup>

Cardiac index or cardiac output is a complex physiologic parameter

that depends on several variables (preload, afterload, contractility), each of which is altered by amrinone. By providing new information regarding previously undescribed pharmacokinetics, we hope that our report<sup>2</sup> will facilitate the additional pharmacodynamic studies needed to explore fully the role of amrinone in the management of cardiac surgical patients.

JAMES M. BAILEY, M.D., PH.D.  
JERROLD H. LEVY, M.D.  
GARY ROGERS, M.D.  
FANIA SZLAM, M.M.S.  
CARL C. HUG, M.D., PH.D.  
*Department of Anesthesiology  
Emory University School of Medicine  
1364 Clifton Road, N.E.  
Atlanta, Georgia 30322*

## REFERENCES

1. Lathi KG, Shulman MS, Diehl JT, Stetz JJ: The use of amrinone and norepinephrine for inotropic support during emergence from cardiopulmonary bypass. *J Cardiothorac Vasc Anesth* 5: 250–254, 1991
2. Bailey JM, Levy JH, Rogers HG, Szlam F, Hug CC Jr: Pharmacokinetics of amrinone during cardiac surgery. *ANESTHESIOLOGY* 75:961–968, 1991
3. Edelson J, Lejemtel TH, Alousi AA, Biddlecome CE, Maskin CS, Sonnenblick EH: Relationship between amrinone plasma concentration and cardiac index. *Clin Pharmacol Ther* 29:723–728, 1981
4. Wilson H, Rocci ML Jr, Weber KT, Andrews A, Likoff MJ: Pharmacokinetics and hemodynamics of amrinone in patient with chronic heart failure of diverse etiology. *Res Commun Chem Pathol Pharmacol* 56:3–19, 1987
5. Butterworth JF 4th, Royster RL, Robertie PG, Zaloga GP, Prielipp RC, Dudas LM: Hemodynamic effects of amrinone in patients recovering from aortocoronary bypass surgery. *Anesth Analg* 70:545, 1990
6. Ramsay JG, DeJesus JM, Wynands JE, Ralley FE, O'Conner JP, Robbins GR, Bilodeau J: Pharmacokinetics of amrinone during cardiac surgery. *Can J Anaesth*, in press

(Accepted for publication April 1, 1992.)

## Spinal Nerve Root Is One of the Preferred Routes for Transfer of Drugs to the Nerve Roots and Spinal Cord from the Epidural Space

*To the Editor:*—The recent paper by Bernards and Hill<sup>1</sup> does not give proper attention to the histologic structure of the spinal root sleeve. Figure 1 in their publication shows the pia-arachnoid mater ending at the proximal part of the root sleeve. Our studies have shown that the leptomeninges on the root continue as perineural epithelium covering the entire peripheral nervous system, including almost all the sensory and motor end organs.<sup>2–5</sup> As the dura mater continues distally as epi- and perineural connective tissue on the spinal nerve root, its

thickness is considerably reduced. The pia and arachnoid mater join at the proximal segment of the dorsal root ganglion and continue as perineural epithelium (fig. 1) on peripheral nerves.<sup>4</sup> Furthermore, the arachnoid villi are found in less than 40% of the nerve roots sectioned.<sup>4,6</sup> These villi have intercellular spaces that open to the subarachnoid space on the proximal part of the nerve roots (fig. 1).<sup>4,6,7</sup> These histologic features make the root sleeve the weakest, and the specialized section through which the solutes and small particulate matter can
